# Supplementary material
Source: publisher site journal article supplement (https://www.dovepress.com/article/146663)
Supplement: Supplementary file 1 [file get_supplementary_file.php]

|              |              |             |             |             |             |             |             |             |             |             |             |             |             |             |
|--------------|--------------|-------------|-------------|-------------|-------------|-------------|-------------|-------------|-------------|-------------|-------------|-------------|-------------|-------------|
| EIF4B        | -1.073961176 | 0.004237271 | 0.047127736 | 9.229454905 | 8.406806219 | 9.578585834 | 9.750776542 | 8.187779805 | 8.450690528 | 9.24235307  | 10.02182908 | 9.922790819 | 10.15551596 | 10.10796422 |
| M6PR         | -1.418988457 | 0.004242432 | 0.047159303 | 8.91796228  | 7.989914082 | 9.335705513 | 9.988421197 | 8.466685344 | 9.579599737 | 10.35078184 | 10.54154989 | 10.50902373 | 10.90272674 | 10.65355062 |
| SLC38A6      | -1.418141623 | 0.004249927 | 0.047216754 | 8.99402837  | 7.467829679 | 7.169282493 | 8.483474893 | 6.7348895   | 8.358259456 | 7.27350438  | 9.015330501 | 9.502961114 | 9.041845292 | 9.24458317  |
| ZNF492       | 1.623247134  | 0.00427504  | 0.047434698 | 3.630809822 | 4.486355485 | 4.216612047 | 5.975783178 | 4.906182066 | 2.961263532 | 4.086252754 | 2.987057133 | 2.734434115 | 2.696183    | 2.382628006 |
| ANG          | -1.358911442 | 0.004285269 | 0.047505397 | 7.084640862 | 5.88339329  | 5.554450372 | 5.005233447 | 5.636716194 | 6.295912235 | 6.982049209 | 7.555626692 | 6.897706509 | 7.533361594 | 7.701748463 |
| DUXAP10      | 1.934865498  | 0.00429607  | 0.047547236 | 9.135276364 | 8.489839215 | 5.73081674  | 8.464204025 | 6.924255083 | 7.878965403 | 7.683389086 | 5.954694452 | 5.263198866 | 5.98086153  | 6.094209397 |
| MRPL36       | -1.68656832  | 0.004304474 | 0.047575073 | 9.096132235 | 6.924970743 | 9.274090747 | 9.375799143 | 8.751427789 | 10.11032988 | 9.56318371  | 10.79841022 | 10.57451293 | 10.70343043 | 10.72473927 |
| STX11        | -1.191096799 | 0.004310352 | 0.047575073 | 4.101059749 | 4.264338032 | 5.66015961  | 4.524597538 | 5.363734954 | 5.669081096 | 4.284095508 | 6.070066908 | 5.876059253 | 6.158067313 | 6.012803144 |
| TTC32        | 1.143403328  | 0.004314178 | 0.047575073 | 7.520329953 | 8.75797005  | 7.820488435 | 7.388716855 | 7.340445075 | 6.558762192 | 7.609936268 | 6.629530816 | 6.231207099 | 6.577896466 | 6.271551638 |
| BDNF         | -1.176785022 | 0.004318083 | 0.047575073 | 5.19109819  | 5.94598322  | 4.809677516 | 5.46420759  | 6.502877882 | 6.380530457 | 4.973349832 | 6.636756847 | 6.9407572   | 6.566089304 | 7.002236556 |
| NIPA1        | -1.153559049 | 0.004319414 | 0.047575073 | 5.723846439 | 4.35008269  | 5.717655737 | 5.085857802 | 5.620843476 | 5.439946757 | 6.55395708  | 6.66850981  | 6.703839287 | 6.761314182 | 6.476110051 |
| SILV         | -4.961869035 | 0.004347387 | 0.047790366 | 12.12207333 | 11.64939287 | 6.301077777 | 12.18946329 | 6.651193688 | 5.951407068 | 11.87524169 | 14.51105393 | 14.42884099 | 14.59979461 | 14.44484359 |
| HAUS6        | -1.210632141 | 0.004348645 | 0.047790366 | 5.822080734 | 4.678009918 | 6.339343829 | 6.301826153 | 6.681345085 | 5.297494592 | 6.265892798 | 7.26645624  | 7.183304988 | 6.831391998 | 7.210514259 |
| LOC100130429 | 1.42813047   | 0.004374723 | 0.048024952 | 6.187990989 | 5.615622752 | 4.77323883  | 5.314768095 | 4.819034775 | 3.867100583 | 4.146591678 | 3.713444063 | 3.317965323 | 3.953679327 | 3.14487381  |
| H2AFJ        | -1.072583161 | 0.004390209 | 0.048067262 | 8.923808158 | 6.997265998 | 7.833079941 | 8.387795539 | 7.881329606 | 8.539353844 | 8.304753546 | 9.347763678 | 9.215904459 | 9.175565732 | 9.046748281 |
| CDK5         | -1.360938615 | 0.004391835 | 0.048067262 | 7.671126762 | 6.867104289 | 6.921794408 | 8.516637721 | 7.445845611 | 8.617850559 | 8.760481632 | 9.138317054 | 9.086515886 | 9.431786051 | 9.101901743 |
| CMTM4        | -1.187210231 | 0.00440718  | 0.048145928 | 5.846047846 | 6.718211341 | 5.648438051 | 7.115564708 | 6.911447204 | 6.614267278 | 7.644323868 | 7.948367336 | 7.889161609 | 7.769591895 | 7.712177394 |
| TRAM2        | -1.186712898 | 0.004408683 | 0.048145928 | 7.271199408 | 6.698762496 | 7.270524436 | 7.905509566 | 7.057817353 | 8.56125834  | 6.939332071 | 9.138606988 | 8.515138106 | 8.157505804 | 8.480974219 |
| MCEE         | -1.155150519 | 0.004409463 | 0.048145928 | 6.104815432 | 6.751961111 | 7.099291281 | 7.199618725 | 5.733405462 | 7.652853738 | 7.145698613 | 7.998139375 | 8.006529594 | 8.121509718 | 7.744505882 |
| ZNF519       | 1.234751725  | 0.004424262 | 0.048281538 | 6.849697035 | 5.189137429 | 5.592611845 | 4.901892246 | 6.344547102 | 5.051370635 | 5.205879464 | 4.355422438 | 4.381069146 | 4.3487938   | 4.338642433 |
| WDR75        | 1.128796699  | 0.00443062  | 0.048299272 | 9.196919923 | 9.683351304 | 8.701493429 | 9.456853534 | 8.137438773 | 8.479473011 | 9.92670608  | 7.990574243 | 8.034077283 | 7.799305013 | 7.993562982 |
| LOC100506556 | -1.476459234 | 0.004437774 | 0.048324548 | 6.514850855 | 5.832228791 | 6.685446695 | 7.365702787 | 6.881708349 | 7.653936025 | 8.565815538 | 8.555393204 | 8.423023492 | 8.672394882 | 8.540561951 |
| TP53RK       | -1.035670025 | 0.004446805 | 0.048324548 | 7.285942918 | 7.342693603 | 8.395158444 | 8.865089099 | 7.667167508 | 8.485394279 | 7.949416888 | 9.121131032 | 8.986281637 | 9.04163979  | 8.988406349 |
| CD33         | 1.154728373  | 0.004470747 | 0.048476086 | 5.40835555  | 5.922616603 | 6.546257564 | 5.424699952 | 6.279749031 | 6.087934755 | 7.301127509 | 4.632610591 | 5.176426185 | 5.098164906 | 5.02859395  |
| PVRL3        | -1.796855121 | 0.004477801 | 0.048526643 | 6.86601153  | 5.6478753   | 6.065103291 | 5.324061994 | 7.602208185 | 8.059856913 | 6.349632096 | 8.690307712 | 8.389402515 | 7.514686262 | 8.830023601 |
| CD93         | 2.180300115  | 0.004491266 | 0.048599929 | 6.309916712 | 6.429548422 | 9.307600833 | 6.606515765 | 8.776040152 | 8.842159221 | 6.75218478  | 5.377102413 | 5.403696181 | 5.519597208 | 5.277812817 |
| NDNL2        | -1.096383326 | 0.004492002 | 0.048599929 | 6.671945216 | 5.409788872 | 7.441173777 | 6.416539645 | 6.094134399 | 6.65693611  | 6.815571619 | 7.438310886 | 7.691455154 | 7.822363216 | 7.436883843 |
| CA14         | -2.323929223 | 0.004496535 | 0.048599929 | 7.418256217 | 7.864375257 | 6.169406234 | 9.510253169 | 6.326413166 | 5.176778752 | 7.479920299 | 9.461917777 | 9.278730586 | 9.897397165 | 9.197901703 |
| TMEM109      | -1.298274946 | 0.0045144   | 0.048715196 | 8.696447001 | 6.898842036 | 8.956875544 | 8.869689825 | 8.014791913 | 9.12544519  | 8.483253123 | 9.815753496 | 9.596539535 | 9.913231886 | 9.6077718   |
| C14orf142    | -1.84001022  | 0.004521406 | 0.048751626 | 6.219797014 | 5.494004748 | 7.678970128 | 7.862073783 | 6.488212633 | 8.581529528 | 7.901547682 | 9.224222487 | 8.958539393 | 8.984542361 | 8.893385507 |
| MMP3         | -2.733655658 | 0.004550693 | 0.049011295 | 4.890285249 | 5.260805654 | 4.804489151 | 5.038093722 | 4.834405873 | 6.424845886 | 6.012367829 | 9.50637403  | 9.570795722 | 4.898249267 | 8.253656964 |
| C10orf35     | 1.022223827  | 0.004556547 | 0.049013672 | 7.593400022 | 7.505065364 | 6.970136596 | 7.141998069 | 6.310614585 | 6.116319268 | 7.521860942 | 6.04419549  | 5.988124921 | 6.045491177 | 5.924375873 |
| APOBEC3C     | -1.097120857 | 0.004562705 | 0.049053912 | 7.957956679 | 6.990262044 | 8.912415668 | 8.777122767 | 8.333074062 | 8.542709385 | 8.119393914 | 9.447384009 | 9.311157476 | 9.360069756 | 9.202977627 |
| KIF13B       | -1.004004896 | 0.004571039 | 0.049091505 | 7.78634433  | 7.143882928 | 7.388592822 | 6.809959118 | 8.136414605 | 8.45407527  | 7.701304551 | 8.65545716  | 8.416471985 | 8.935658733 | 8.534473776 |
| MANSC1       | 1.20061952   | 0.004575207 | 0.049110283 | 8.23902178  | 8.858100559 | 9.376960194 | 9.128205187 | 7.966581949 | 7.483967044 | 8.321599568 | 7.777615574 | 6.971708422 | 7.119193876 | 7.25725335  |
| DNAJC15      | -1.318846829 | 0.004585459 | 0.049142366 | 8.499560732 | 7.140545713 | 8.37282484  | 7.339201916 | 8.372505475 | 8.680404772 | 9.368373549 | 9.634218468 | 9.358656554 | 9.411527208 | 9.884366226 |
| PXK          | -1.114219775 | 0.004593701 | 0.049152848 | 6.029394984 | 6.327990497 | 7.269879271 | 5.497256056 | 5.78147793  | 6.496700019 | 7.099276477 | 7.445304276 | 7.625472562 | 7.354766023 | 7.461036372 |
| UFSP2        | -1.392895407 | 0.004604026 | 0.049237361 | 8.0094581   | 6.380964778 | 8.186622121 | 7.838720487 | 7.269417715 | 8.889175789 | 8.531594942 | 9.240310805 | 9.286046489 | 9.42836205  | 9.105978817 |
| C13orf18     | 2.28294033   | 0.00460799  | 0.049253809 | 9.739473976 | 7.596100125 | 10.00393225 | 6.553757234 | 7.275249164 | 7.240257108 | 7.444283654 | 5.468121242 | 6.54102236  | 5.597826157 | 5.177299498 |
| CBWD1        | -1.339965823 | 0.00461372  | 0.049259996 | 8.909591208 | 8.261437959 | 9.699598362 | 10.56032844 | 9.385371669 | 10.34929147 | 9.467710345 | 10.57492641 | 10.90998023 | 10.91139476 | 11.03975015 |
| ASPA         | -1.922977348 | 0.004615849 | 0.049259996 | 6.547195784 | 6.778954203 | 5.727418682 | 7.174639135 | 6.747779102 | 8.322002316 | 4.781449105 | 8.221716094 | 8.773730578 | 9.106527986 | 7.92104235  |
| CXorf40A     | -1.201526613 | 0.004638569 | 0.049424495 | 8.788188364 | 7.085897823 | 8.507129534 | 8.410280429 | 7.344783215 | 8.975473374 | 8.037929855 | 9.290008259 | 9.381554609 | 9.471520819 | 9.319984249 |
| FAM19A5      | -2.607932211 | 0.004663622 | 0.049561754 | 7.20920023  | 4.541714212 | 4.454280505 | 7.666503342 | 7.828256384 | 5.929850187 | 4.529420588 | 8.618099831 | 9.23365215  | 8.911227581 | 7.759735253 |
| LOC645212    | -1.012946327 | 0.004663659 | 0.049561754 | 6.764638527 | 5.41391329  | 6.54437055  | 5.91615089  | 5.303564789 | 5.985427995 | 6.63523344  | 7.202896313 | 7.228836449 | 6.93952026  | 7.002417703 |
| HSPB2        | -1.797858353 | 0.004679862 | 0.049681923 | 7.377572813 | 7.054457558 | 6.023067571 | 9.060642879 | 6.472022209 | 8.230788209 | 7.376883566 | 9.476442569 | 8.351965994 | 9.535765287 | 9.310365166 |
| DEF6         | 1.446017302  | 0.004714961 | 0.049871953 | 6.872351117 | 7.006671168 | 8.892664294 | 7.708982316 | 6.904173119 | 7.016246146 | 6.123773466 | 5.588513834 | 5.818143251 | 5.940104421 | 5.740518788 |
